# Supplementary material for: PLS-DA Model for the Evaluation of Attention Deficit and Hyperactivity Disorder in Children and Adolescents through Blood Serum FTIR Spectra
Source: MDPI journal article supplement (doi:10.3390/molecules26113400), 2021-06-03
Supplement: s1 [file s1]

# PLS-DA Model for the Evaluation of Attention Deficit and Hyperactivity Disorder in Children and Adolescents through Blood Serum FTIR Spectra

Gulce Ogruc Ildiz,<sup>1,2,\*</sup> Ahmet Karadag,<sup>1</sup> Ersin Kaygisiz<sup>3</sup> and Rui Fausto<sup>2</sup>

<sup>1</sup>Department of Physics, Faculty of Sciences and Letters, Istanbul Kultur University, 34158 Istanbul, Turkey

<sup>2</sup>Department of Chemistry, CQC, University of Coimbra, P-3004-535 Coimbra, Portugal

<sup>3</sup>Department of Geological Engineering, Istanbul University-Cerrahpasa, 34320 Istanbul, Turkey

\* Correspondence: g.ogruc@iku.edu.tr ; Tel.: +90 (212) 498 4319

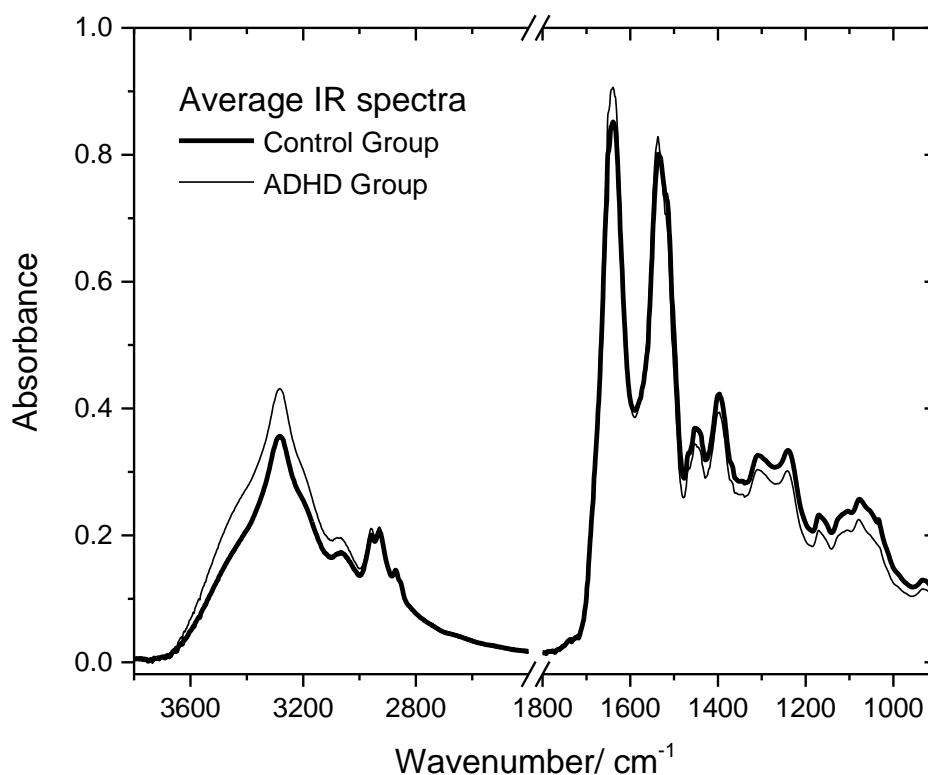

**Figure S1.** Average IR spectrum of Control Group blood serum samples (3700–2400 and 1800–900 cm<sup>-1</sup> regions). The average spectrum of the ADHD Group is also depicted (thin line) for comparison.

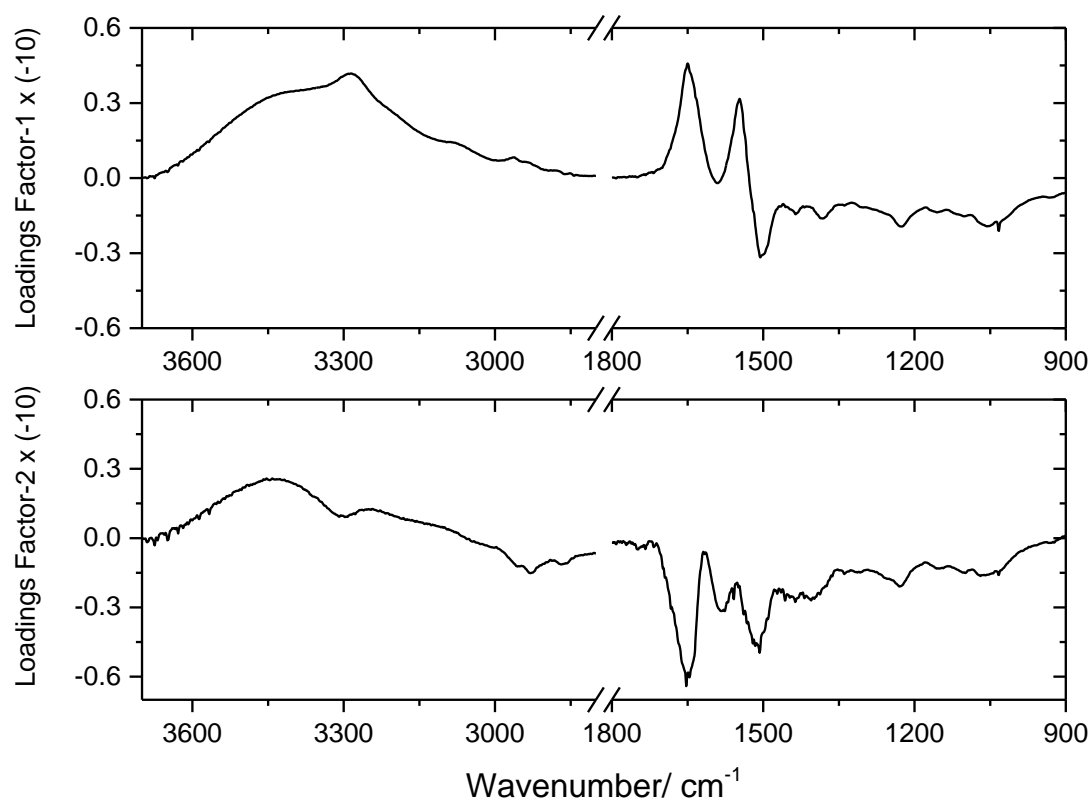

**Figure S2.** Loadings of of Factor-1 and Factor-2 of the developed PLS-DA classification model. The loadings are plotted multiplied by the factor -10 for a better comparison between the loadings of Factor-1 and the difference spectrum between the average IR spectra of the ADHD and the Control groups shown in Figure 2 of the article.
